# Supplementary material for: Conformal and non-conformal surface modification of honeycomb-patterned porous films via tunable Cassie–Wenzel transition
Source: Royal Society of Chemistry journal article supplement (doi:10.1039/c6ra08606c), 2016-01-01
Supplement: c6ra08606c1.pdf [file c6ra08606c1.pdf]

## Electronic Supplementary Information

### Conformal and Non-conformal Surface Modification of Honeycomb-Patterned Porous Films via Tunable Cassie-Wenzel Transition

Qi-Zhi Zhong<sup>†</sup>, Xiang Yu<sup>†</sup>, Ming-Xu Cui<sup>†</sup>, Ling-Shu Wan<sup>\*†‡</sup>, Zhi-Kang Xu<sup>†‡</sup>

<sup>†</sup>MOE Key Laboratory of Macromolecular Synthesis and Functionalization, Department of  
Polymer Science and Engineering, Zhejiang University, Hangzhou 310027, China

<sup>‡</sup>Key Laboratory of Adsorption and Separation Materials & Technologies of Zhejiang  
Province, Hangzhou 310027, China

\*Corresponding author. Fax: +86 571 87951592; Tel: +86 571 87953763; E-mail:

lswan@zju.edu.cn.

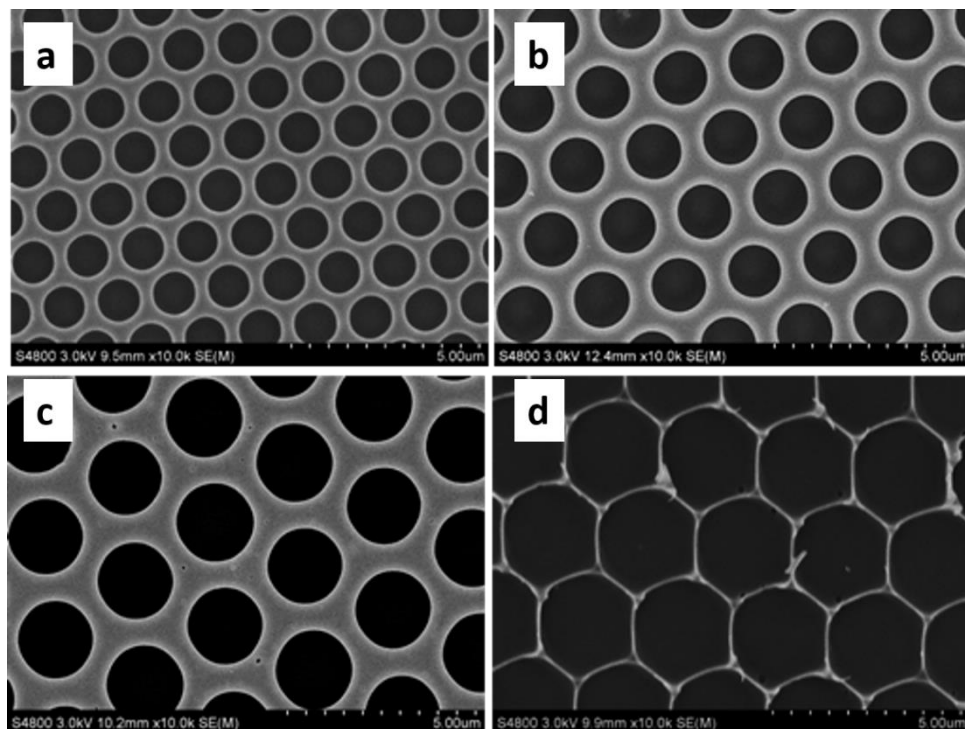

**Fig. S1** Top-down SEM images of honeycomb films with (a) small pore size (pore diameter is 1.12  $\mu\text{m}$  and the porosity is 50.6%), (b) moderate pore size (pore diameter is 1.51  $\mu\text{m}$  and the porosity is 43.1%), and (c) large pore size (pore diameter is 2.19  $\mu\text{m}$  and the porosity is 49.1%). (d) Pincushion-like surface fabricated from the honeycomb film with moderate pore size.

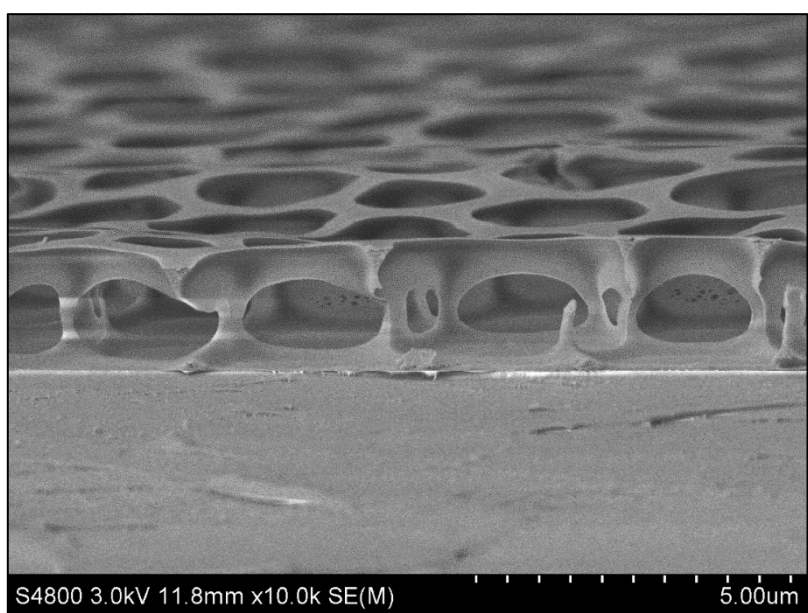

**Fig. S2** Cross-section SEM images of honeycomb films in which there are connected pores.

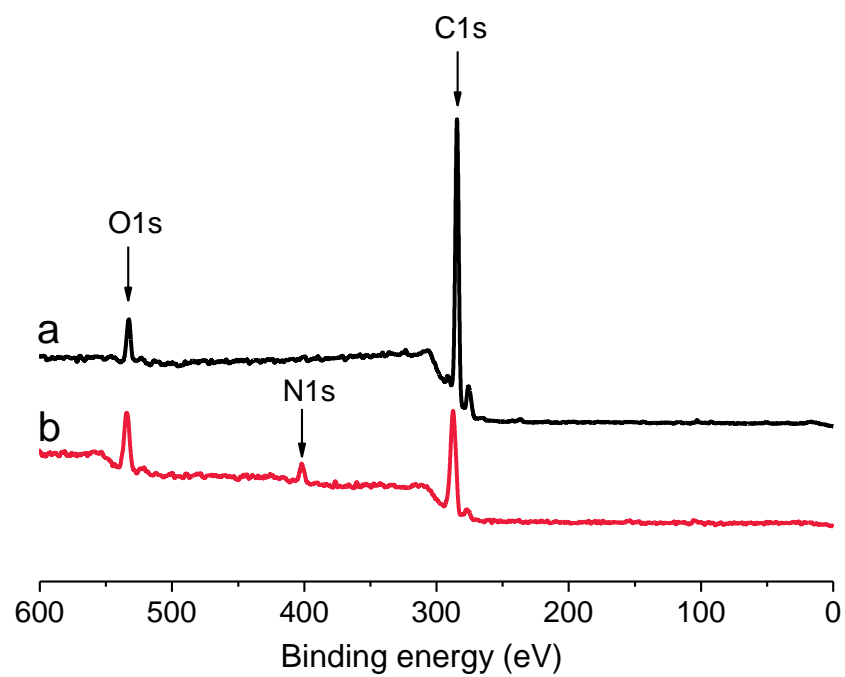

**Fig. S3** XPS spectra of nascent (a) and PDA/PEI coated honeycomb films (b).

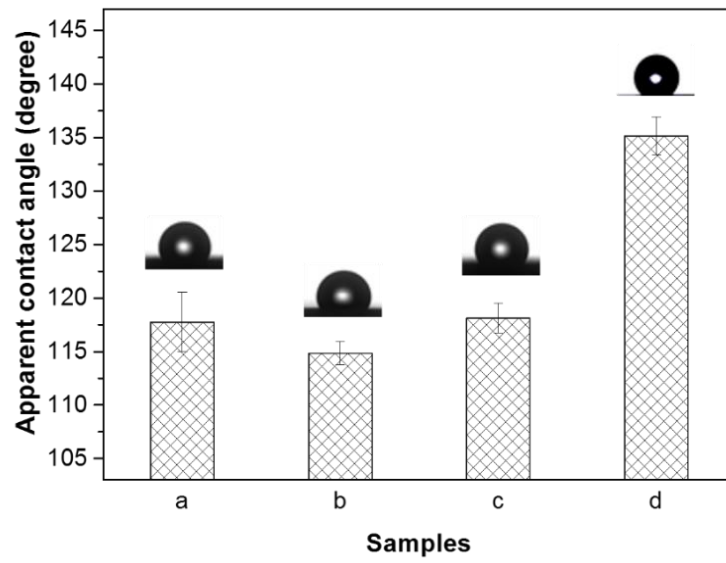

**Fig. S4** Apparent water contact angles on honeycomb films with (a) small, (b) moderate, and (c) large pore sizes, and (d) pincushion-like surface fabricated from the honeycomb film with moderate pore size.

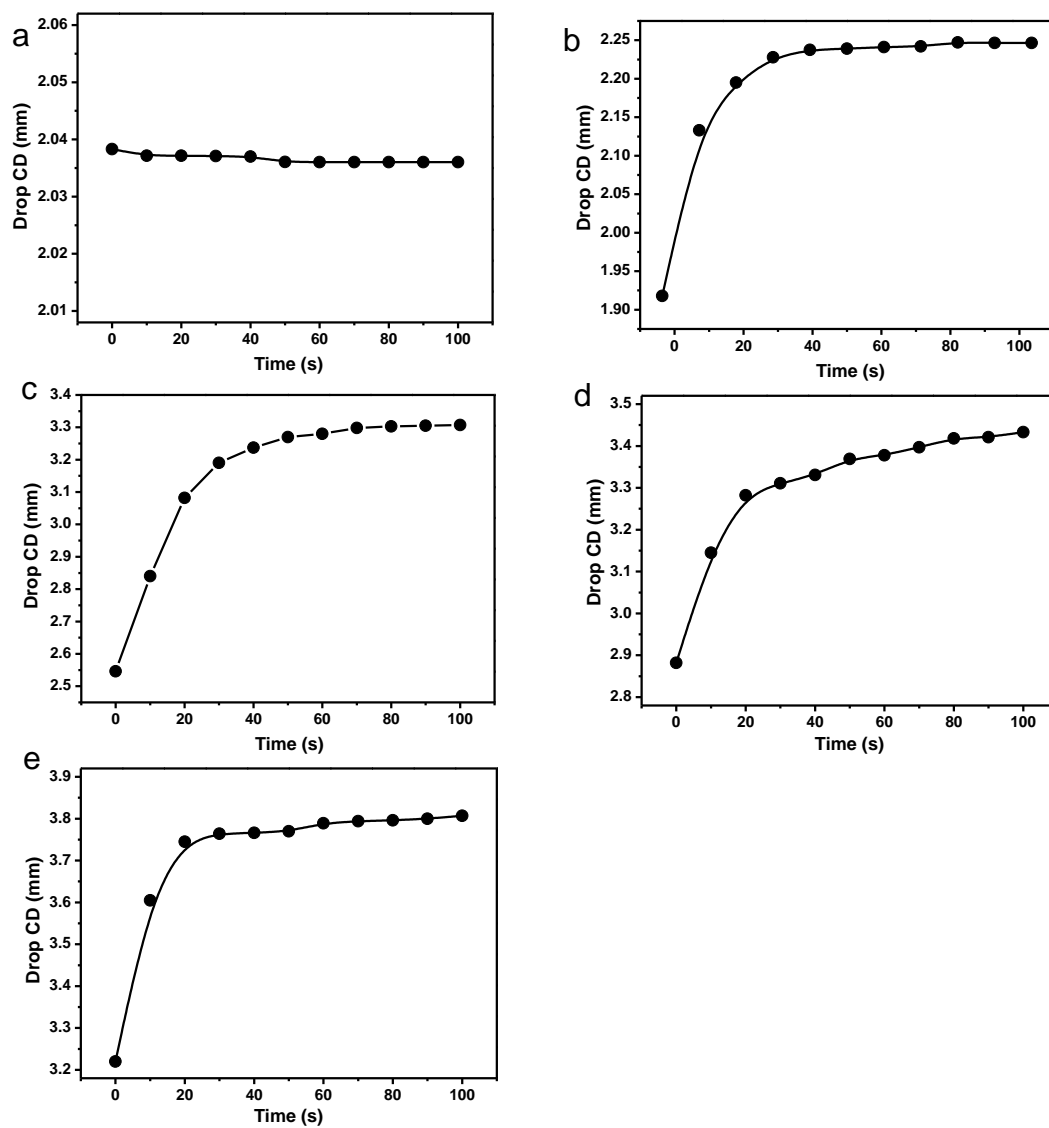

**Fig. S5** Effects of co-deposition time on drop CD. Dopamine/PEI = 2/1 mg/mL. (a-e) films with deposition time 0, 6, 12, 18, and 24 hours, respectively.
